# Supplementary material for: Histone Methylation Participates in Gene Expression Control during the Early Development of the Pacific Oyster Crassostrea gigas
Source: MDPI journal article supplement (doi:10.3390/genes10090695), 2019-09-10
Supplement: s1 [file s1]

| Accession Number | Gene Name                                                                            | Putative biological function<br>(source UniProt)                         |
|------------------|--------------------------------------------------------------------------------------|--------------------------------------------------------------------------|
| AM856044         | <b>Tctex1</b> domain-containing protein 2                                            | Cilium assembly                                                          |
| CX068923         | valine-rich protein Iso 4                                                            | Metabolism                                                               |
| CU684113         | Retrograde protein of 51 kDa<br>( <b>RGP51</b> )                                     | Unknown                                                                  |
| CU993915         | Tubulin polyglutamylase complex<br>subunit 1 ( <b>TPGS1</b> )                        | Differentiation,<br>Spermatogenesis                                      |
| AJ565452         | Beta-1,3-galactosyltransferase 1<br>( <b>B3GALT1</b> )                               | Protein glycosylation                                                    |
| CU996496         | Glycine-rich cell wall structural<br>protein ( <b>GRP-1</b> )                        | Cell wall<br>biogenesis/degradation                                      |
| AM865428         | Nucleoside-triphosphate<br>phosphatase                                               | DNA and RNA synthesis                                                    |
| FP010217         | Sodium/potassium/calcium<br>exchanger 2 ( <b>SLC24A2</b> )                           | Ion transport                                                            |
| CU989510         | Pyruvate carboxylase                                                                 | Metabolism                                                               |
| FP002044         | Sentrin-specific protease 1 ( <b>SEN1</b> )                                          | Ubl conjugation pathway                                                  |
| CU996825         | Phosphatidate phosphatase ( <b>app1</b> )<br>Iso2                                    | Lipid metabolism                                                         |
| FP002409         | Glutaredoxin-like protein C5orf63<br>homolog                                         | Electron transport                                                       |
| CX069021         | IgGFC-binding protein ( <b>FcyBP</b> ) Iso2                                          | Maintenance                                                              |
| FP007188         | N-alpha-acetyltransferase 25, NatB<br>auxiliary subunit ( <b>NAA25</b> )             | N-terminal peptidyl-<br>methionine acetylation, Cell<br>cycl progression |
| CU993728         | Protein <b>CLN8</b>                                                                  | Cell proliferation,<br>metabolism                                        |
| FP001871         | Nuclear hormone receptor <b>E75</b>                                                  | DNA Binding                                                              |
| AM856297         | Tripartite motif-containing protein 2<br>( <b>TRIM2</b> )                            | Ubl conjugation pathway                                                  |
| FP011648         | Monocarboxylate transporter 2<br>( <b>SLC16A7</b> )                                  | Symport, transport                                                       |
| FP002939         | 23S rRNA (guanine(2445)-N(2))-<br>methyltransferase                                  | Unknown                                                                  |
| AM854490         | EGF-like repeat and discoidin I-like<br>domain-containing protein 3 ( <b>EDIL3</b> ) | Cell adhesion                                                            |
| CU996619         | Zinc finger protein 593 homolog<br>( <b>Y56A3A.18</b> )                              | ribosomal large subunit<br>export from nucleus                           |
| AJ565497         | Tubulin polymerization-promoting<br>protein family member 3 ( <b>TPPP3</b> )         | Bind tubulin, cell<br>proliferation, mitosis                             |
| CU681484         | Hemicentin-2 ( <b>Hmcn2</b> )                                                        | Response to stimulus                                                     |
| FP001130         | Retinol dehydrogenase 11 ( <b>RDH11</b> )                                            | Retinoid metabolic process                                               |
| FP009647         | Solute carrier family 23 member 2<br>( <b>SLC23A2</b> )                              | Symport, transport                                                       |
| AM854697         | Ectoine hydroxylase                                                                  | 2-oxoglutarate-dependent<br>dioxygenase activity                         |

|          |                                                                  |                                                                                                          |
|----------|------------------------------------------------------------------|----------------------------------------------------------------------------------------------------------|
| CU999928 | NAD(P) transhydrogenase subunit alpha ( <b>pntA</b> )            | NADPH regeneration, proton transmembrane transport                                                       |
| CU986550 | Cytochrome P450 26A1 ( <b>CYP26A1</b> )                          | Organ development, metabolism                                                                            |
| CU994988 | Protein <b>PIF</b>                                               | Chitin metabolic process                                                                                 |
| FP009041 | Cation-independent mannose-6-phosphate receptor ( <b>IGF2R</b> ) | Organ development, transport                                                                             |
| CU994773 | Neurensin-1 ( <b>Nrsn1</b> )                                     | Nervous system development                                                                               |
| CU999098 | Ribonuclease PH ( <b>Rph</b> )                                   | rRNA et tRNA processing                                                                                  |
| FP091108 | Dopamine receptor 1 ( <b>DOP1R1</b> )                            | Response to stimulus                                                                                     |
| AM861792 | Dolichyl-diphosphooligosaccharide ( <b>Rpn1</b> )                | Cellular protein modification process                                                                    |
| FP008253 | Big defensin 3 ( <b>BigDef3</b> )                                | Antimicrobial peptide                                                                                    |
| AM855042 | Muscle M-line assembly protein <b>unc-89</b>                     | Cellular protein localization                                                                            |
| CU684359 | Valine-rich protein Iso 4                                        | Metabolism                                                                                               |
| AM865375 | FH2 domain-containing protein 1 ( <b>FHDC1</b> )                 | Cillium assembly, Golgi Ribbon formation                                                                 |
| FP009859 | Pilus assembly protein <b>PilP</b>                               | Unknown                                                                                                  |
| ES789253 | Translation initiation factor IF-2 Iso1 ( <b>InfB</b> )          | Protein biosynthesis                                                                                     |
| FP004396 | Mantle protein                                                   | Unknown                                                                                                  |
| FP007080 | Hydroxylamine reductase ( <b>hcp</b> )                           | Hydroxylamine catalyzation                                                                               |
| AM857383 | Homeobox protein abdominal-B ( <b>abd-B</b> )                    | Embryonic development, germ cell migration                                                               |
| CU684641 | D-aspartate oxidase ( <b>DDO</b> )                               | Aspartate metabolic/catabolic processes                                                                  |
| FP005933 | Ubiquitin-like modifier-activating enzyme 6 ( <b>UBA6</b> )      | Ubl conjugation pathway                                                                                  |
| AM858253 | Histone RNA hairpin-binding protein ( <b>Slbp</b> )              | mRNA processing, both maternal and zygotic proteins play an essential and vital function for development |
| FP007567 | Exosome complex component RRP46 ( <b>EXOSC5</b> )                | tRNA processing                                                                                          |
| CX069312 | Retrograde protein of 51 kDa Iso2 ( <b>RGP51</b> )               | Unknown                                                                                                  |
| AM863498 | Tripartite motif-containing protein 3 ( <b>TRIM3</b> )           | Ubl conjugation pathway                                                                                  |
