# Supplementary material for: Histone Methylation Participates in Gene Expression Control during the Early Development of the Pacific Oyster Crassostrea gigas
Source: MDPI journal article supplement (doi:10.3390/genes10090695), 2019-09-10
Supplement: s1 [file s1]

| Accession Number | Gene Name                                                                                  | Putative biological function<br>(source UniProt)                                            |
|------------------|--------------------------------------------------------------------------------------------|---------------------------------------------------------------------------------------------|
| FP008154         | Peptide-N(4)-(N-acetyl-beta-D-glucosaminy)lasparagine amidase F<br>GNFase F ( <b>NgI</b> ) | Unknown                                                                                     |
| FP010154         | Complement C1q-like protein 4<br>( <b>C1QL4</b> )                                          | Negative regulation of ERK1 and ERK2 cascades, adipocyte differentiation                    |
| AM857325         | Neuronal acetylcholine receptor subunit alpha-6 ( <b>CHRNA6</b> )                          | Ion transport                                                                               |
| CU991479         | Kyphoscoliosis peptidase ( <b>KY</b> )                                                     | Muscle growth                                                                               |
| CU988470         | Fos-related antigen 1 ( <b>FOSL1</b> )                                                     | Embryonic development, cell proliferation and cycle, response to a stimulus                 |
| CU984081         | Tripartite motif-containing protein 2<br>( <b>Trim2</b> )                                  | Ubl conjugation pathway                                                                     |
| CU997410         | Vacuolar protein sorting-associated protein 28 homolog ( <b>VPS28</b> )                    | Protein transport, Transport                                                                |
| CU989588         | Dual specificity protein phosphatase 14 ( <b>DUSP14</b> )                                  | Involved in the inactivation of MAP kinases                                                 |
| CU990751         | S-phase kinase-associated protein 1<br>( <b>SKP1</b> )                                     | histone H2A monoubiquitination, Cell cycle, Ubl conjugation pathway, Wnt signaling pathway  |
| AM866181         | Cytochrome P450 3A4 ( <b>CYP3A4</b> )                                                      | Lipid metabolism, Steroid metabolism, Sterol metabolism                                     |
| CU990917         | Protein <b>psiR</b>                                                                        | Unknown                                                                                     |
| CU986392         | Actin-related protein 2/3 complex subunit 2 ( <b>ARPC4</b> )                               | Response to DNA damage by promoting nuclear actin polymerization                            |
| AM863962         | Nacrein-like protein P2                                                                    | Regulator for calcification in the shells of mollusks                                       |
| AM868879         | Protein disulfide-isomerase <b>TMX3</b>                                                    | Cell redox homeostasis                                                                      |
| FP000321         | 40S ribosomal protein S6 ( <b>Rps6</b> )                                                   | Cell growth and proliferation                                                               |
| CU987157         | Transmembrane protein 233<br>( <b>TMEM233</b> )                                            | Unknown                                                                                     |
| AM853237         | <b>CD109</b> antigen Iso2                                                                  | Cell proliferation, negative regulation of protein phosphorylation                          |
| CU988311         | COP9 signalosome complex subunit 6<br>( <b>COPS6</b> )                                     | Post-translational protein modification, nucleotide-excision repair, DNA damage recognition |
| CU991460         | Electroneutral sodium bicarbonate                                                          | Ion transport, cell pH                                                                      |

|          |                                                                                     |                                                                   |
|----------|-------------------------------------------------------------------------------------|-------------------------------------------------------------------|
|          | exchanger 1 ( <b>SLC4A8</b> )                                                       | regulation and survival                                           |
| CU996633 | Alpha-crystallin B chain Iso2 ( <b>CRYAB</b> )                                      | Negative regulation of transcription and apoptotic process        |
| CU986548 | Putative tyrosinase-like protein <b>tyr-3</b>                                       | Melanin biosynthetic process                                      |
| FP010231 | Matrix metalloproteinase ( <b>MMP</b> )                                             | Collagen degradation, regulation of cell migration and DNA damage |
| AM866267 | Toll-like receptor 3 ( <b>TLR3</b> )                                                | Immunity, Inflammatory response, Innate immunity                  |
| AM861255 | Latent-transforming growth factor beta-binding protein 4 ( <b>LTBP4</b> )           | Development, cell differentiation, cell growth                    |
| AM855778 | L-xylulose reductase ( <b>DCXR</b> )                                                | Carbohydrate metabolism, Glucose metabolism, Xylose metabolism    |
| CU992874 | Polyamine-modulated factor 1-binding protein 1 ( <b>PMFBP1</b> )                    | Spermatogenesis                                                   |
| AM859820 | Interferon-induced protein 44 Iso2 ( <b>IFI44</b> )                                 | Immune response                                                   |
| CU987577 | Peptidyl prolyl cis-trans isomerase B ( <b>PIIB</b> )                               | Developement                                                      |
| CU684943 | Period circadian protein Iso2 ( <b>Per</b> )                                        | Biological rhythms                                                |
| CU995019 | GMP synthase ( <b>GMPS</b> )                                                        | Cell division, GMP biosynthesis, Purine biosynthesis              |
| CU984299 | Ectoine hydroxylase                                                                 | unknown                                                           |
| CU987464 | Tumor protein p53-inducible protein 11 Iso3 ( <b>Tp53I11</b> )                      | Negative regulation of cell population proliferation              |
| AM865696 | Beta-1,4-galactosyltransferase <b>galt-1</b>                                        | N-glycan processing, protein galactosylation                      |
| CU683571 | Tripartite motif-containing protein 2 ( <b>TRIM2</b> )                              | Ubl conjugation pathway                                           |
| FP010896 | Cytochrome P450 2J6 ( <b>CYP2J6</b> )                                               | Metabolism                                                        |
| CU984444 | Ankyrin repeat and IBR domain-containing protein 1 ( <b>ANKIB1</b> )                | Ubl conjugation pathway                                           |
| CU999022 | N-acetylglucosamine-1-phosphodiester alpha-N-acetylglucosaminidase ( <b>NAGPA</b> ) | Unknown                                                           |
| FP002052 | Thymidine phosphorylase ( <b>TYMP</b> )                                             | Angiogenesis, Chemotaxis, Cell Differentiation                    |
| CU984459 | Electrogenic sodium bicarbonate cotransporter 1 ( <b>SLC4A4</b> )                   | Ion transport, Sodium transport, Symport, Transport               |
| AM869057 | Immunoglobulin epsilon Fc receptor Iso2 ( <b>Fcer2</b> )                            | Immunity                                                          |
| AM861031 | Ubiquitin carboxyl-terminal hydrolase                                               | Immunity, Innate immunity,                                        |

|          |                                                                           |                                                                                                       |
|----------|---------------------------------------------------------------------------|-------------------------------------------------------------------------------------------------------|
|          | 7 ( <b>USP14</b> )                                                        | Ubl conjugation pathway                                                                               |
| AM867288 | Glutathione S-transferase Y1                                              | Metabolism                                                                                            |
| AM868209 | E3 ubiquitin-protein ligase <b>MIB2</b>                                   | Notch signaling pathway,<br>Ubl conjugation pathway                                                   |
| FP011170 | Baculoviral IAP repeat-containing protein 7-B ( <b>birc7-b</b> )          | Apoptosis, Ubl conjugation pathway                                                                    |
| CU986307 | ATP-dependent DNA helicase <b>PIF1</b>                                    | DNA damage, DNA recombination, DNA repair                                                             |
| FP003510 | Mediator of RNA polymerase II transcription subunit 27 ( <b>MED27</b> )   | Transcription regulation                                                                              |
| CU997866 | Tumor suppressor candidate 3 ( <b>TUSC3</b> )                             | Transport                                                                                             |
| CU983908 | Testis-expressed sequence 33 protein Iso2 ( <b>TEX33</b> )                | Unknown                                                                                               |
| AM865729 | Manganese-dependent ADP-ribose/CDP-alcohol diphosphatase ( <b>ADPRM</b> ) | nucleobase-containing small molecule catabolic process                                                |
| AM860224 | Tripartite motif-containing protein 2 ( <b>TRIM2</b> )                    | Ubl conjugation pathway                                                                               |
| FP003669 | V-type proton ATPase 116 kDa subunit a Iso1 ( <b>ATP6V0A1</b> )           | Ion transport                                                                                         |
| FP004994 | Spermatogenesis-associated protein 7 ( <b>SPATA7</b> )                    | Sensory transduction                                                                                  |
| CU995574 | Putative gamma-glutamyltransferase <b>ywrD</b>                            | Glutathione catabolic process                                                                         |
| FP009897 | 1,2-dihydroxy-3-keto-5-methylthiopentene dioxygenase ( <b>Adi1</b> )      | Amino-acid biosynthesis, Methionine biosynthesis                                                      |
| AM854745 | Ubiquitin-conjugating enzyme E2 D4 ( <b>UBE2D4</b> )                      | Ubl conjugation pathway                                                                               |
| CX069279 | Carboxypeptidase B ( <b>CPB1</b> )                                        | Proteolysis                                                                                           |
| CU683581 | Golgi phosphoprotein 3 ( <b>GOLPH3</b> )                                  | Protein transport                                                                                     |
| AM855770 | Neurogenic locus notch homolog protein 1 ( <b>NOTCH1</b> )                | Angiogenesis, Differentiation, Notch signaling pathway, Development, Transcription regulation         |
| FP007485 | Sodium-coupled monocarboxylate transporter 1 ( <b>SLC5A1</b> )            | Apoptosis, Ion transport, Sodium transport, Symport                                                   |
| AM856659 | CUB and sushi domain-containing protein 3 ( <b>CSMD3</b> )                | Regulation of dendrite development                                                                    |
| CX069305 | Complement C1q-like protein 4 ( <b>C1QL4</b> )                            | Negative regulation of ERK1 and ERK2 cascade, may inhibit adipocyte differentiation at an early stage |
| CU999029 | Proteasome subunit alpha type-1                                           | Circadian rhythm,                                                                                     |

|          |                                                                                                     |                                                                                                    |
|----------|-----------------------------------------------------------------------------------------------------|----------------------------------------------------------------------------------------------------|
|          | ( <b>Prosalpha6</b> )                                                                               | proteasome-mediated<br>ubiquitin-dependent<br>protein catabolic process,<br>Toll signaling pathway |
| CU987396 | Coiled-coil domain-containing protein<br>178 ( <b>CCDC178</b> )                                     | Unknown                                                                                            |
| CU992173 | 28S ribosomal protein S12,<br>mitochondrial ( <b>MRPS12</b> )                                       | Mitochondrial translation                                                                          |
| AM861630 | Rhomboid-related protein 4<br>( <b>RHHBDD1</b> )                                                    | Apoptosis, Differentiation,<br>Spermatogenesis                                                     |
| CU987910 | Speckle-type POZ protein ( <b>SPOP</b> )                                                            | Ubl conjugation pathway                                                                            |
| CX069297 | Neuroendocrine convertase 1 ( <b>PCSK1</b> )                                                        | Cell signaling, peptide and<br>protein processing                                                  |
| CU994588 | Ankyrin repeat and SOCS box protein<br>3 ( <b>ASB3</b> )                                            | Ubl conjugation pathway                                                                            |
| FP001911 | Synoviocyte proliferation-associated<br>in collagen-induced arthritis protein 1<br>( <b>Saal1</b> ) | Response to stimulus, cell<br>proliferation                                                        |
| CU990223 | Integumentary mucin C.1                                                                             | Reponse to stimulus,<br>immunity                                                                   |
| CU685643 | Receptor-type tyrosine-protein<br>phosphatase kappa ( <b>PTPRK</b> )                                | Cell cycle, cell proliferation,<br>cell migration, transcription                                   |
| CU988555 | Pre-mRNA-splicing factor <b>SYF2</b>                                                                | Gastrulation, embryonic<br>organ development, cell<br>cycle, RNA splicing                          |
| CU991046 | Homeobox protein orthopedia ( <b>Otp</b> )                                                          | Differentiation,<br>Neurogenesis, Transcription<br>regulation                                      |
| AM854715 | Fatty acyl-CoA hydrolase precursor,<br>medium chain                                                 | Fatty acid biosynthesis,<br>Fatty acid metabolism, Lipid<br>biosynthesis, Lipid<br>metabolism      |
| FP007109 | EAL domain-containing protein                                                                       | Unknown                                                                                            |
