# Supplementary material for: Histone Methylation Participates in Gene Expression Control during the Early Development of the Pacific Oyster Crassostrea gigas
Source: MDPI journal article supplement (doi:10.3390/genes10090695), 2019-09-10
Supplement: s1 [file s1]

| Accession Number | Gene Name                                                                  | Putative biological function<br>(source UniProt)                       |
|------------------|----------------------------------------------------------------------------|------------------------------------------------------------------------|
| CU988981         | Alpha-N-acetylgalactosaminidase<br>( <b>NAGA</b> )                         | Glycolipid and carbohydrate catabolic process                          |
| FP009095         | Protein <b>MMS22</b>                                                       | Genome integrity during DNA replication                                |
| CU991170         | Anaphase-promoting complex subunit 4 ( <b>ANAPC4</b> )                     | Positive regulation of mitotic metaphase/anaphase transitions          |
| AM864639         | Vacuolar-sorting protein <b>SNF8</b>                                       | Endosomal transport and transcriptional regulation                     |
| CU991506         | Tripartite motif-containing protein 2<br>( <b>TRIM2</b> )                  | Protein polyubiquitination                                             |
| AM857976         | Contactin-5 ( <b>CNTN5</b> )                                               | Cell adhesion during nervous system development                        |
| FP001149         | Phenylserine dehydratase                                                   | Gluconeogenesis                                                        |
| AM854656         | Reversion-inducing cysteine-rich protein with Kazal motifs ( <b>RECK</b> ) | Embryonic morphogenesis, cell migration, regulation of the Wnt pathway |
| CU995707         | Vacuolar ATPase assembly integral membrane protein <b>VMA21</b>            | Regulation of ATPase activity                                          |
| AM861623         | Solute carrier family 13 member 2<br>( <b>SLC13A2</b> )                    | Transport of sodium ions and dicarboxylate                             |
| CB617395         | Integrin beta-like protein A ( <b>ITGBL1</b> )                             | Cell adhesion                                                          |
| CU992985         | Delta(14)-sterol reductase-like<br>( <b>DBR2</b> )                         | Metabolic process                                                      |
| FP011715         | 26S proteasome non-ATPase regulatory subunit 5 ( <b>PSMD3</b> )            | Maintenance of protein homeostasis, cell cycle progression             |
| AM861441         | Asteroid-like protein 1 ( <b>ASTE1</b> )                                   | DNA repair                                                             |
| FP002068         | Mitochondrial fission factor ( <b>MFF</b> )                                | Mitochondrial fission                                                  |
| CU988912         | Cryptic protein ( <b>CFC1</b> )                                            | Gastrulation, Heart development, anatomical structure development      |
| CU988028         | Ubiquitin carboxyl-terminal hydrolase isozyme L3 ( <b>UCHL3</b> )          | Ubiquitin-dependent protein catabolic process                          |
| AM862952         | Fanconi anemia core complex-associated protein 20 ( <b>FAAP20</b> )        | DNA damage, DNA repair                                                 |
| CU986965         | Collagen alpha-1(I) chain ( <b>COL1A1</b> )                                | Embryonic development and ossification                                 |
| CU991884         | Calmodulin-2 ( <b>Calm2</b> )                                              | Cell cycle progression                                                 |
| AM865788         | Cytidine deaminase ( <b>CDA</b> )                                          | Cell growth                                                            |
| AM868621         | Protein <b>ARV1</b>                                                        | Sterol and lipid metabolism, transport                                 |
| CU986603         | Heat shock 70 kDa protein 12A<br>( <b>HSPA12A</b> )                        | ATP binding                                                            |
| CU996139         | Tyrosinase-like protein 1 ( <b>TYRP1</b> )                                 | Cell cycle proliferation                                               |

|          |                                                                                |                                                                    |
|----------|--------------------------------------------------------------------------------|--------------------------------------------------------------------|
| FP011792 | Phosphatidylinositol N-acetylglucosaminyltransferase subunit P ( <b>PIGP</b> ) | GPI-anchor biosynthesis                                            |
| ES789933 | Coatomer subunit gamma-2 ( <b>COPG2</b> )                                      | ER-Golgi transport, Protein transport, Transport                   |
| FP008417 | Neurochondrin Iso 2 ( <b>NCDN</b> )                                            | Signaling transduction                                             |
| AM867236 | Filamin-A-interacting protein 1 ( <b>FILIP1</b> )                              | Cell migration                                                     |
| CU995344 | Tetraspanin-3 ( <b>TSPAN3</b> )                                                | Cell proliferation and migration                                   |
| AM862482 | Protocadherin alpha-C2 ( <b>PCDHAC2</b> )                                      | Cell adhesion                                                      |
| CU683837 | Senescence associated protein ( <b>DIN1</b> )                                  | Senescence                                                         |
| CU997478 | Carnosine synthase 1 ( <b>CARNS1</b> )                                         | Carnosine biosynthetic process                                     |
| CU990242 | Peptidyl-prolyl cis-trans isomerase <b>FKBP4</b>                               | Protein folding                                                    |
| CU999062 | Tripartite motif-containing protein 2 ( <b>TRIM2</b> )                         | Protein polyubiquitination                                         |
| AM866619 | Peroxidasin homolog ( <b>PXDN</b> )                                            | Hydrogen peroxyde                                                  |
| AM855549 | Sodium-independent sulfate anion transporter ( <b>SLC26A11</b> )               | Anion exchange, Ion transport, Transport                           |
| AM865586 | Tripartite motif-containing protein 75 ( <b>TRIM75</b> )                       | Metal-binding                                                      |
| CU990665 | Sodium/potassium-transporting ATPase subunit beta ( <b>ATP1B1</b> )            | Cell adhesion, Sodium/potassium transport                          |
| AM864143 | Nuclear pore complex protein <b>Nup107</b>                                     | mRNA transport, Protein transport, Translocation, Transport        |
| FP007022 | Small integral membrane protein 7 ( <b>Smim7</b> )                             | Unknown                                                            |
| FP005820 | UPF0582 protein C13orf37, mitotic spindle organizing protein 1 ( <b>MZT1</b> ) | Gamma-tubulin Complex localization                                 |
| FP006374 | Eukaryotic translation initiation factor 2-alpha kinase 3 ( <b>EIF2AK3</b> )   | Stress response, Translation regulation, Unfolded protein response |
| FP008354 | Tyrosinase                                                                     | Cell population proliferation                                      |
| FP010483 | Focadhesin Iso 2 ( <b>Focad</b> )                                              | Potential tumor suppressor                                         |
| EX956409 | Tripartite motif-containing protein 3 ( <b>TRIM3</b> )                         | Protein transport, Transport, Nervous system development           |
| CU999647 | Interferon-induced protein 44 ( <b>IFI44</b> )                                 | Immune response                                                    |
| FP009925 | GRIP1-associated protein 1 ( <b>GRIPAP1</b> )                                  | Protein transport, Transport                                       |
| CX068921 | Perilipin-2 ( <b>PLIN2</b> )                                                   | Development and maintenance of adipose tissue                      |
| CU993737 | Sodium- and chloride-dependent glycine transporter 2 ( <b>Slc6a5</b> )         | Neurotransmitter transport, Symport, Transport                     |
| CU991458 | Dystrophin ( <b>DMD</b> )                                                      | Muscle organ development                                           |
| AM865975 | LON peptidase N-terminal domain                                                | Protein polyubiquitination                                         |

|          |                                                                                         |                                                             |
|----------|-----------------------------------------------------------------------------------------|-------------------------------------------------------------|
|          | and RING finger protein 3 Iso 1<br>( <b>LONRF1</b> )                                    |                                                             |
| CU997996 | Nucleoside-triphosphate<br>phosphatase                                                  | Cellular response                                           |
| AM864917 | Tyrosine-protein kinase <b>BTK</b>                                                      | Adaptative immunity and<br>transcription regulation         |
| CU683400 | Peptidase inhibitor 15-A ( <b>pi15a</b> )                                               | Multicellur organsim<br>development                         |
| FP002317 | Zinc finger protein 511 ( <b>ZNF511</b> )                                               | Transcription regulation                                    |
| FP003562 | Tripartite motif-containing protein 3<br>( <b>TRIM3</b> )                               | Protein transport, Transport,<br>Nervous system development |
| CU991980 | Mitochondrial 2-oxodicarboxylate<br>carrier ( <b>SLC25A21</b> )                         | Transport                                                   |
| FP009692 | Transmembrane protein 19<br>( <b>TMEM19</b> )                                           | Transport                                                   |
| AM856286 | DNA-directed RNA polymerases I, II,<br>and III subunit ( <b>RPABC3</b> )                | Transcription                                               |
| FP012155 | 39S ribosomal protein L1<br>(Mitochondrial) ( <b>MRPL1</b> )                            | RNA-binding                                                 |
| CU990714 | 1-phosphatidylinositol 4,5-<br>bisphosphate phosphodiesterase<br>eta-2 ( <b>PLCH2</b> ) | Neural development                                          |
| CX739579 | Short-chain collagen C4                                                                 | Unknown                                                     |
| CU997185 | shisa-5                                                                                 | Apoptosis                                                   |
| CU990470 | SUMO-conjugating enzyme UBC9-B<br>( <b>ube2ib</b> )                                     | Cell cycle, Cell division, protein<br>sumoylation           |
| AM861301 | Kinesin KIF20B                                                                          |                                                             |
| FP000402 | Regulator of rDNA transcription<br>protein 15 ( <b>RRT15</b> )                          | Transcription regulation                                    |
| FP005094 | Threonylcarbamoyladenosine tRNA<br>methylthiotransferase ( <b>CDKAL1</b> )              | tRNA processing                                             |
| AM863112 | Gigasins-6                                                                              | Protease function                                           |
| AB288344 | Lysozyme 2 ( <b>Lyz2</b> )                                                              | Lysozyme activity                                           |
